# Supplementary material for: Antimicrobial Bilayer Nanocomposites Based on the Incorporation of As-Synthetized Hollow Zinc Oxide Nanotubes
Source: MDPI journal article supplement (doi:10.3390/nano10030503), 2020-03-11
Supplement: s1 [file s1]

## Supplementary Material

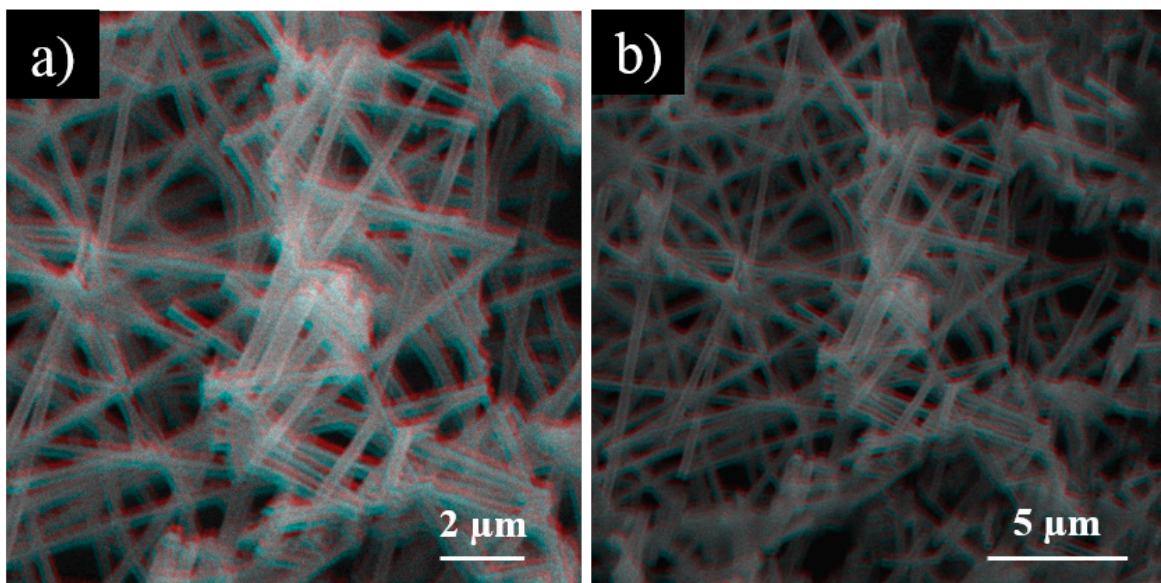

**Fig. S1.** SEM micrographs (3D-SEM) of hollow ZnONT at magnifications: a) 15 kx; and b) 10 kx.

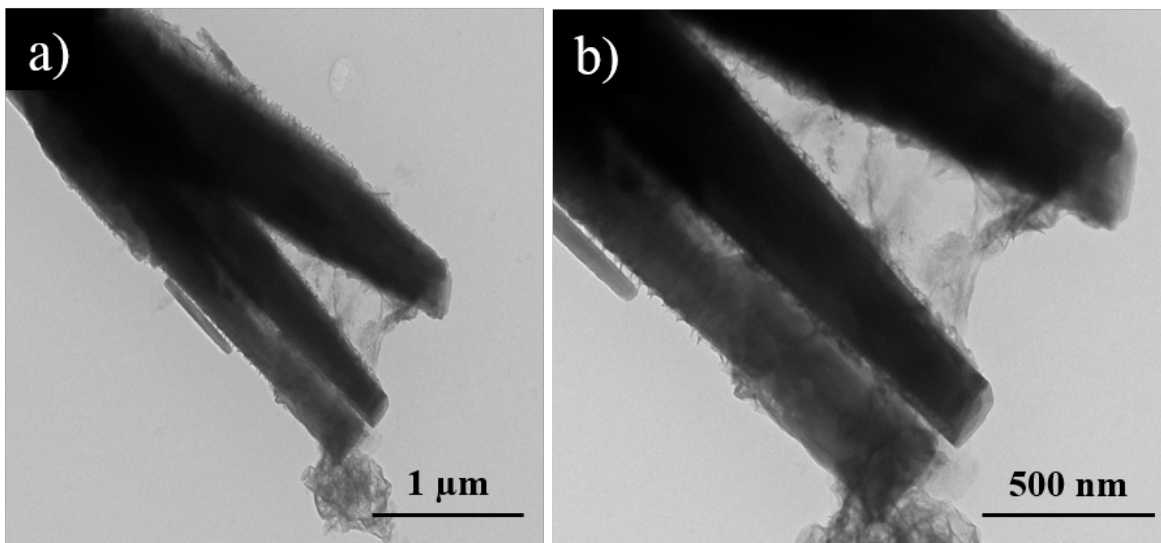

**Fig. S2.** TEM images of ZnO-PV<sub>f</sub> after washing process: (ZnO- PV<sub>f</sub>)-B.

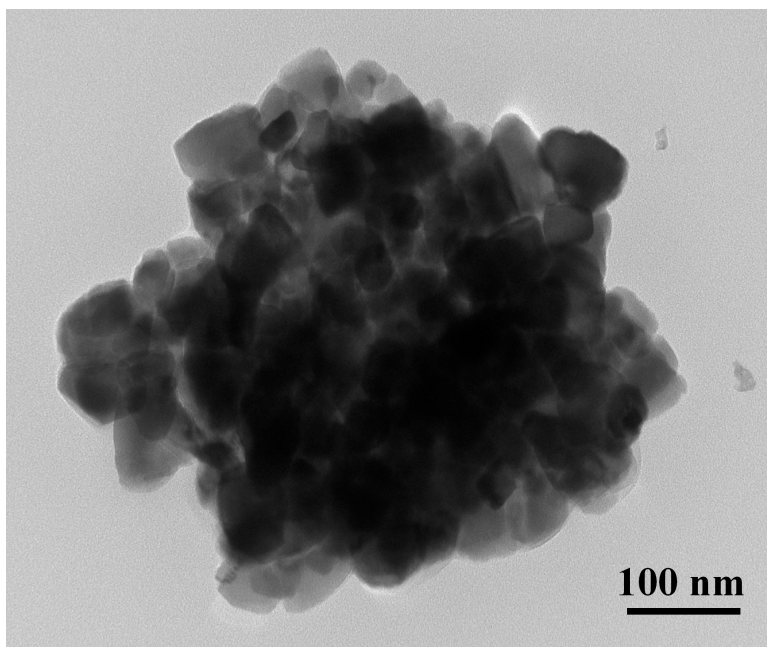

**Fig. S3.** TEM image of commercial ZnONP.
